# Supplementary material for: Risk factors and simple scoring system for predicting postoperative nutritional status of Hirschsprung’s disease
Source: Frontiers journal article supplement (doi:10.3389/fnut.2024.1441104), 2024-12-06
Supplement: Table_1.pdf [file Table_1.pdf]

Supplementary Table 1. Diagnosis of collinearity for determinants (derivation sample).

| Determinants                               | Tolerance | Variance expansion factor |
|--------------------------------------------|-----------|---------------------------|
| Feeding method                             | 0.957     | 1.045                     |
| Preoperative nutritional status            | 0.802     | 1.247                     |
| Preoperative HAEC                          | 0.831     | 1.203                     |
| Relationship of caregivers                 | 0.863     | 1.158                     |
| Type of HSCR                               | 0.913     | 1.095                     |
| Postoperative complications within 30 days | 0.956     | 1.046                     |
| Surgery for other systemic malformation    | 0.975     | 1.026                     |

HAEC, Hirschsprung-associated enterocolitis; HSCR, Hirschsprung's disease.
